# Supplementary material
Source: Springer Nature journal article supplement (https://springermedizin.de/resource/supplementary/12899_2008_121_MOESM2_ESM.pdf/9514962)

**A**

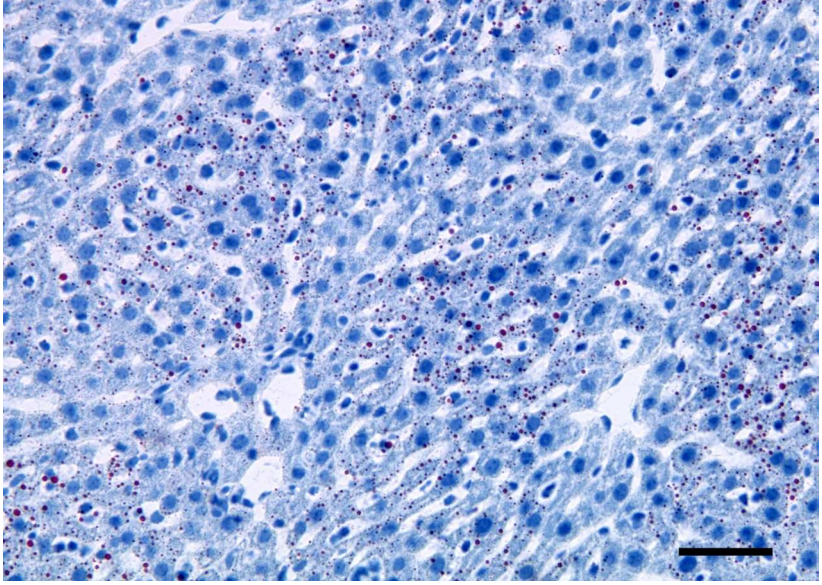

**B**

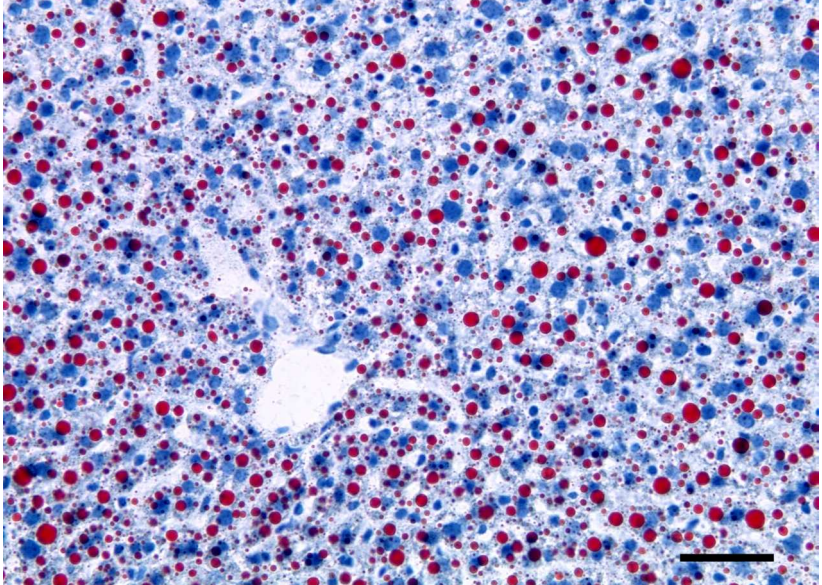

Supplement: MOESM2 [file 9514962]
